# Supplementary material for: Temperature sensitive p(N-isopropylacrylamide-co-acrylic acid) modified gold nanoparticles for trans-arterial embolization and angiography
Source: Royal Society of Chemistry journal article supplement (doi:10.1039/c6tb02383e), 2016-12-20
Supplement: c6tb02383e1.pdf [file c6tb02383e1.pdf]

## Supporting Information

Temperature Sensitive p(*N*-isopropylacrylamide-*co*-acrylic Acid) Modified  
Gold Nanoparticles for Trans-Arterial Embolization and angiography

*Yiming Liu, Xiaole Peng, Kun Qian, Yingying Ma, Jiangshan Wan, Han Li, Hongsen Zhang,  
Guofeng Zhou, Bin Xiong, Yanbing Zhao,\* Chuansheng Zheng,\* Xiangliang Yang,\**

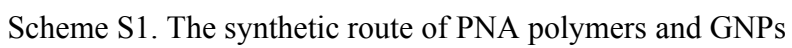

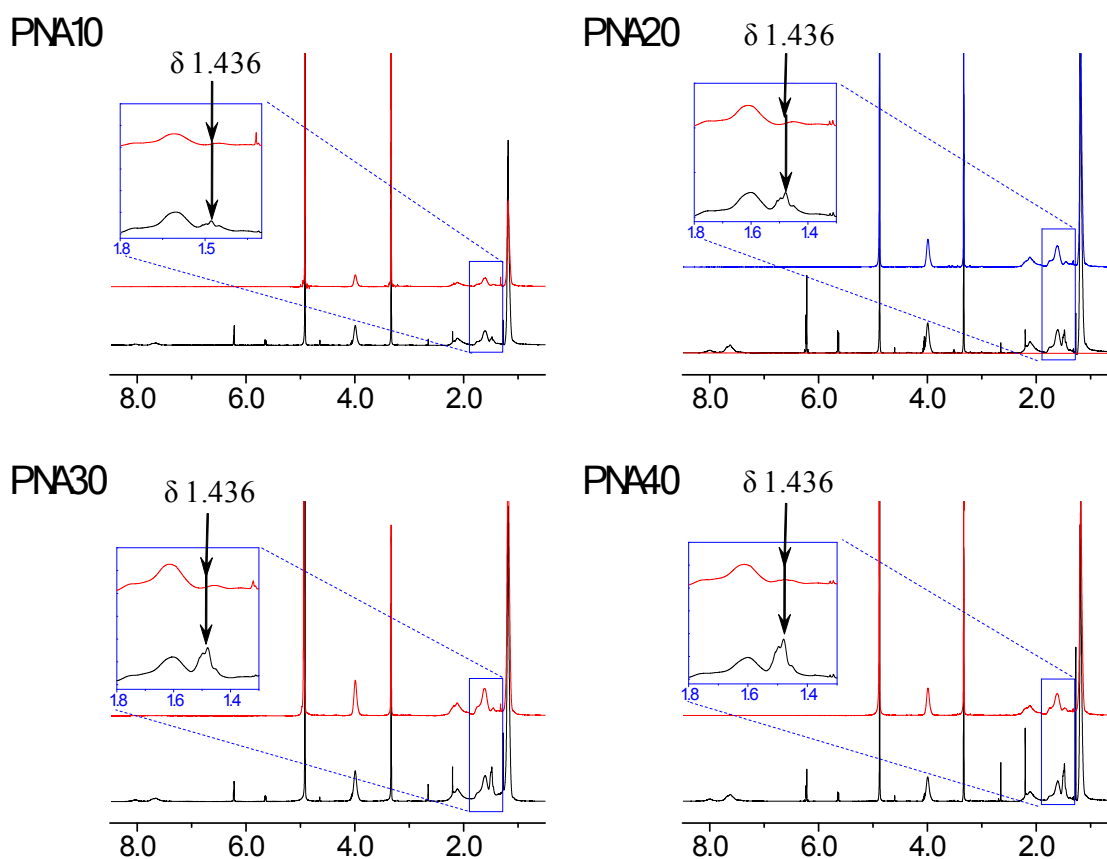

Figure S1.  $^1\text{H}$ -NMR spectrum comparison of four PNA triblock polymers (red lines) with their corresponding precursors PNtB polymers (black lines).  $\delta 1.436$  was the chemical shift of methyl hydrogen in *tert*-butyl groups of PNtB polymers, which disappeared in the  $^1\text{H}$ -NMR spectra of PNA polymers.  $\delta 4.0$  was the chemical shift of methyne hydrogen in NIPAM.

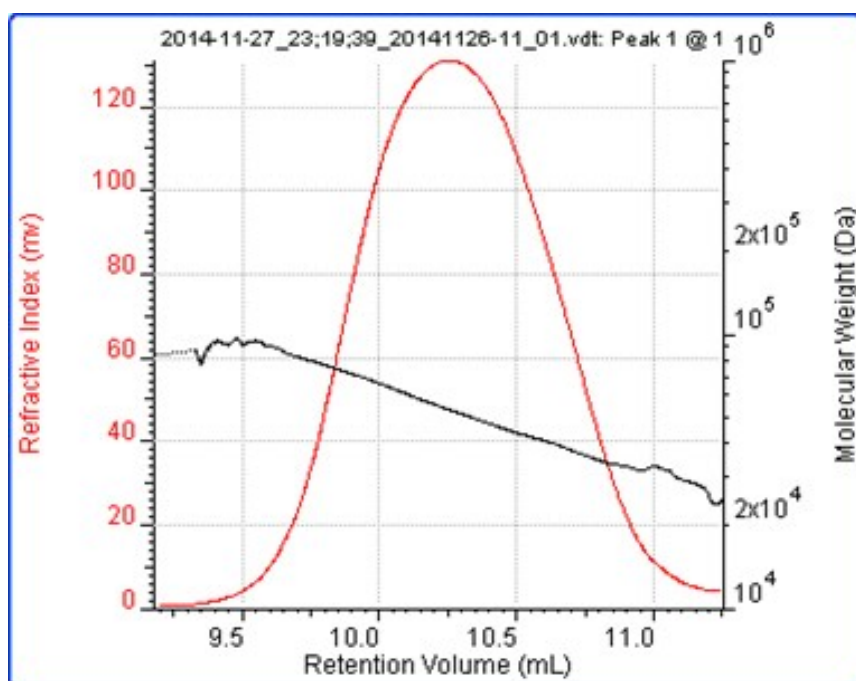

Figure S2. The GPC spectrum of PNA polymers.
